# Supplementary material for: A quantitative assessment of the behavior of metallic elements in urban soils exposed to industrial dusts near Dunkirk (Northern France)
Source: Copernicus journal article supplement (doi:10.5194/egusphere-2024-1875), 2024-10-14
Supplement: Supplementary file 1 [file egusphere-2024-1875-supplement.pdf]

**Table S1: Detection limits (DL) and uncertainties in major element measurements according to sample concentration range. “-“ means no data.**

| Oxides                         | Concentration ranges |        |       |         |           | DL % |
|--------------------------------|----------------------|--------|-------|---------|-----------|------|
|                                | >10 %                | 5-10 % | 1-5 % | 0.5-1 % | 0.1-0.5 % |      |
| Na <sub>2</sub> O              | -                    | <5 %   | <10 % | <25 %   | -         | 0.5  |
| MgO                            | -                    | <5 %   | <10 % | <20 %   | -         | 0.7  |
| Al <sub>2</sub> O <sub>3</sub> | <5 %                 | <10 %  | <20 % | -       | -         | 1.9  |
| SiO <sub>2</sub>               | <5 %                 | -      | -     | -       | -         | 10   |
| K <sub>2</sub> O               | -                    | <5 %   | <10 % | <15 %   | -         | 0.9  |
| CaO                            | <5 %                 | <10 %  | <20 % | -       | -         | 2.1  |
| Fe <sub>2</sub> O <sub>3</sub> | <5 %                 | <5 %   | <10 % | -       | -         | 0.1  |

**Table S2: Selected references from JCPDS data base for mineralogical analysis. RIR: Reference Intensity Ratio.**

| Ref. code   | Score | Compound Name | RIR  |
|-------------|-------|---------------|------|
| 01-085-0335 | 74    | Quartz        | 3.03 |
| 01-081-2027 | 66    | Calcite       | 3.23 |
| 00-009-0466 | 46    | Feldspars     | 2.1  |
| 01-070-1868 | 35    | Micas         | 0.79 |

**Table S3: Detection limit (DL, in ppb) and recovery values of the reference standards (MESS-3 and PACS-2) after ICP-AES/MS total PTE analysis.**

|         | Element | MESS-3 | PACS-2 | DL (ppb) |
|---------|---------|--------|--------|----------|
| ICP-AES | Cu      | 93 %   | 100 %  | 5        |
| ICP-MS  | Cr      | 88 %   | 91 %   | 0.025    |
|         | Mn      | 82 %   | 89 %   | 0.025    |
|         | Ni      | 92 %   | 102 %  | 0.3      |
|         | Zn      | 72 %   | 93 %   | 0.150    |
|         | Mo      | 99 %   | 92 %   | 0.005    |
|         | Cd      | 107 %  | 99 %   | 0.003    |

**Table S4: Hydrogen Index (HI; mg HC/g TOC) and Oxygen Index (OI<sub>RE6</sub>; mg O<sub>2</sub>/g TOC) characterizing the four soil cores. “-“ means no data.**

| Core  | Depth (cm) | HI (mg HC/g TOC) | OI <sub>RE6</sub> (mg O <sub>2</sub> /g TOC) |
|-------|------------|------------------|----------------------------------------------|
| 1     | 0-1        | 314              | 169                                          |
|       | 1-2        | 332              | 162                                          |
|       | 2-3        | 335              | 159                                          |
|       | 3-4        | 322              | 162                                          |
|       | 4-5        | 314              | 164                                          |
|       | 5-6        | 313              | 165                                          |
|       | 7-8        | 300              | 165                                          |
|       | 9-10       | 289              | 169                                          |
|       | 10-11      | -                | -                                            |
|       | 2          | 0-1              | 270                                          |
| 1-2   |            | 266              | 157                                          |
| 2-3   |            | 234              | 154                                          |
| 3-4   |            | 204              | 163                                          |
| 4-5   |            | 173              | 159                                          |
| 5-6   |            | 172              | 164                                          |
| 7-8   |            | 146              | 164                                          |
| 9-10  |            | 137              | 196                                          |
| 10-11 |            | -                | -                                            |
| 3     |            | 0-1              | 294                                          |
|       | 1-2        | 286              | 169                                          |
|       | 2-3        | 262              | 175                                          |
|       | 3-4        | 246              | 183                                          |
|       | 4-5        | 232              | 188                                          |
|       | 5-6        | 219              | 190                                          |
|       | 7-8        | 198              | 199                                          |
|       | 9-10       | 179              | 218                                          |
|       | 10-11      | -                | -                                            |
|       | 4          | 0-1              | 266                                          |
| 1-2   |            | 266              | 175                                          |
| 2-3   |            | 254              | 178                                          |
| 3-4   |            | 226              | 184                                          |
| 4-5   |            | 198              | 189                                          |
| 5-6   |            | 179              | 196                                          |
| 7-8   |            | 159              | 196                                          |
| 9-10  |            | 156              | 198                                          |
| 10-11 |            | -                | -                                            |

**Table S5: Total (quartz, calcite, feldspars, micas) and clay (smectite, illite, kaolinite, chlorite) mineral composition (%) of the four studied cores. “-“ means no data.**

| Core  | Depth (cm) | Quartz (%) | Calcite (%) | Feldspars (%) | Micas (%) | Smectite (%) | Illite (%) | Kaolinite (%) | Chlorite (%) |
|-------|------------|------------|-------------|---------------|-----------|--------------|------------|---------------|--------------|
| 1     | 0-1        | 86         | 4           | 3             | 7         | 7            | 56         | 22            | 15           |
|       | 1-2        | 86         | 4           | 3             | 7         | 17           | 50         | 21            | 11           |
|       | 2-3        | 83         | 4           | 3             | 10        | 22           | 46         | 20            | 11           |
|       | 3-4        | 84         | 5           | 3             | 8         | 22           | 45         | 31            | 3            |
|       | 4-5        | 84         | 4           | 4             | 8         | 25           | 47         | 18            | 10           |
|       | 5-6        | 84         | 3           | 3             | 10        | 14           | 50         | 25            | 11           |
|       | 7-8        | 79         | 5           | 4             | 12        | 29           | 43         | 19            | 8            |
|       | 9-10       | -          | -           | -             | -         | 36           | 36         | 15            | 13           |
|       | 10-11      | 81         | 5           | 3             | 11        | -            | -          | -             | -            |
|       | 2          | 0-1        | 77          | 8             | 4         | 11           | 23         | 50            | 18           |
| 1-2   |            | 77         | 8           | 5             | 10        | 35           | 41         | 15            | 9            |
| 2-3   |            | 81         | 7           | 4             | 8         | 27           | 48         | 15            | 10           |
| 3-4   |            | 77         | 8           | 4             | 11        | 35           | 42         | 15            | 8            |
| 4-5   |            | 77         | 8           | 4             | 11        | 35           | 41         | 16            | 7            |
| 5-6   |            | 72         | 11          | 5             | 12        | 34           | 41         | 15            | 9            |
| 7-8   |            | 74         | 8           | 4             | 14        | 32           | 44         | 16            | 9            |
| 9-10  |            | -          | -           | -             | -         | -            | -          | -             | -            |
| 10-11 |            | 70         | 12          | 4             | 14        | 34           | 42         | 15            | 9            |
| 3     |            | 0-1        | 56          | 19            | 4         | 21           | 43         | 32            | 17           |
|       | 1-2        | 57         | 21          | 4             | 18        | 49           | 28         | 15            | 8            |
|       | 2-3        | 49         | 27          | 4             | 20        | 41           | 33         | 16            | 10           |
|       | 3-4        | 52         | 24          | 4             | 20        | 55           | 25         | 14            | 6            |
|       | 4-5        | 56         | 21          | 4             | 19        | 52           | 27         | 14            | 7            |
|       | 5-6        | 47         | 20          | 8             | 25        | 55           | 26         | 14            | 6            |
|       | 7-8        | 65         | 16          | 3             | 16        | 53           | 27         | 13            | 8            |
|       | 9-10       | -          | -           | -             | -         | -            | -          | -             | -            |
|       | 10-11      | 51         | 25          | 5             | 19        | 54           | 26         | 14            | 7            |
|       | 4          | 0-1        | 70          | 12            | 5         | 13           | 39         | 36            | 14           |
| 1-2   |            | 67         | 12          | 5             | 16        | 52           | 26         | 14            | 8            |
| 2-3   |            | 71         | 12          | 4             | 13        | 62           | 21         | 11            | 6            |
| 3-4   |            | 74         | 10          | 4             | 12        | 65           | 19         | 10            | 6            |
| 4-5   |            | 67         | 14          | 4             | 15        | 62           | 20         | 13            | 5            |
| 5-6   |            | 68         | 12          | 3             | 17        | 67           | 18         | 11            | 5            |
| 7-8   |            | 66         | 11          | 4             | 19        | 63           | 20         | 11            | 7            |
| 9-10  |            | -          | -           | -             | -         | -            | -          | -             | -            |
| 10-11 |            | 67         | 13          | 3             | 17        | 67           | 17         | 10            | 5            |
